Running head: Longitudinal study of childhood listening difficulties

## 1 **Childhood listening and associated cognitive difficulties persist into adolescence**

Katsuaki Kojima<sup>1,2,3</sup>, Li Lin<sup>3</sup>, Lauren Petley<sup>3,4</sup>, Nathan Clevenger<sup>3</sup>, Mark Bodik<sup>3,5</sup>, David R. Moore<sup>3,6,7</sup>

1. Perinatal Institute, Cincinnati Children's Hospital Medical Center, 3333 Burnet Avenue, Cincinnati, OH 45229-3039
2. Department of Pediatrics, University of Cincinnati College of Medicine, 3230 Eden Avenue, Cincinnati, OH 45267
3. Communication Sciences Research Center, Cincinnati Children's Hospital Medical Center, 240 Albert Sabin Way, Cincinnati, OH 45229
4. Department of Psychology, Clarkson University, 8 Clarkson Ave, Potsdam, NY 13699
5. Cornell University, Ithaca, NY 14850
- 2 6. Departments of Otolaryngology and Neuroscience, University of Cincinnati College of  
3 Medicine, Cincinnati, OH
- 4 7. Manchester Centre for Audiology and Deafness, University of Manchester, UK

Keywords: hearing loss, speech-in-noise, listening difficulty, cognition, pediatric, longitudinal, auditory processing disorder, NIH Cognition Toolbox

Corresponding author: [Katsuaki.kojima@cchmc.org](mailto:Katsuaki.kojima@cchmc.org)

5  
6 Data sharing statement: The data that support the findings of this study are available from the  
7 corresponding author upon reasonable request.

8

## Research highlights

- 1 • Children aged 6-13 years with clinically normal audiograms are often reported by their caregivers to
- 2 have listening difficulties
- 3 • In a four-year longitudinal evaluation, children with listening difficulties were found to have
- 4 persistent challenges in competing speech segregation and generally poor cognitive performance
- 5 • Maternal education, spatial segregation of speech, and cognitive performance independently predicted
- 6 the degree of the children's listening difficulties

## Abstract (213 words /250 words)

7 Our objective in this study was to examine children with and without listening difficulty (LiD)  
8 longitudinally to ask whether LiD was developmentally transient or persistent. Like many other  
9 developmental problems, we hypothesized that LiD persists into adolescence. Behavioral and  
10 physiological data were collected from children initially aged 6-13 years at baseline and two and four  
11 years later. Of 169 enrolled participants, 147, 100, and 31 children completed required testing in study  
12 visits at baseline, 2 years, and 4 years later, respectively. All children had clinically normal audiograms at  
13 all visits. Listening skills scores from a caregiver report scale (ECLiPS), and auditory and cognitive skills  
14 were significantly poorer in the LiD group than in a typically developing (TD) group throughout the study  
15 period. In both groups, age-adjusted listening and auditory skills increased over time. Using the  
16 longitudinal data, a parsimonious prediction model for ECLiPS scores (pooled across groups) was created.  
17 The final model included maternal education, spatial listening skills, and cognitive performance, which  
18 explained 54.8% of the variance in the ECLiPS score. Children with LiD but normal audiograms have,  
19 relative to TD children, persistent listening difficulties, challenges in competing speech tasks, and poor  
20 cognitive performance through adolescence. The degree of LiD can be independently predicted by  
21 maternal education, cognitive performance, and spatial listening skills.  
22

## 1 INTRODUCTION

2 Language development is critically dependent on sensitive hearing, as classically measured using  
3 pure tone audiometry (Tomblin et al. 2015; Carhart and Jerger 1959). However, active listening to sounds  
4 is also of great importance since attention must be focused to accurately comprehend the meaning of  
5 speech and other sound sequences (Fleta 2014; Bulut and Karasakaloglu 2017). Listening difficulty (LiD)  
6 has been defined as difficulty hearing and understanding speech and other suprathreshold sounds despite  
7 having normal pure-tone hearing sensitivity (Boothalingam et al. 2019; Pienkowski 2017; Farah et al.  
8 2014; Parthasarathy et al. 2020; Petley et al. 2021). Childhood LiD can be assessed using a validated and  
9 standardized caregiver questionnaire, the ECLiPS (Barry et al. 2015). The prevalence of LiD in children  
10 is unknown. Previously, approximately 1–5% of children have been shown to consult audiology services  
11 without having a hearing loss (Hind et al. 2011; Brewer et al. 2016). This is within the range of young  
12 children who do have hearing loss (Schmucker et al. 2019). LiD has been closely associated with multiple  
13 other developmental problems, including attention deficit hyperactivity disorder (Sharma et al. 2014),  
14 reading disorders (Dawes and Bishop 2010), developmental language disorder (Ferguson et al. 2011), and  
15 autism spectrum disorder (Azouz et al. 2014).

16 To determine the contribution of hearing, listening, and non-auditory factors to LiD, we recently  
17 completed the longitudinal Sensitive Indicators of Childhood Listening Difficulties (SICLiD) project  
18 (Moore et al. 2020; Hunter et al. 2021; Petley et al. 2021). We characterized LiD in 6- to 13-year-old  
19 children with normal audiograms during the baseline, cross-sectional phase of the project (Wave 1) using  
20 various caregiver reports and auditory, physiological, and cognitive test measures (Petley et al. 2021). We  
21 found that these children had mostly normal ear (Hunter et al. 2021) and brainstem (Hunter et al.,  
22 submitted) function but higher speech hearing signal/noise thresholds (LiSN-S; (Cameron and Dillon  
23 2007)) and lower cognitive scores (NIH Cognition Toolbox; (Weintraub et al. 2013b)) than typically  
24 developing (TD) children (Petley et al. 2021).

25 Whether LiD is a transient childhood problem that resolves with age or persists into adulthood is  
26 unclear. Answering this question is essential for developing management strategies and understanding the  
27 mechanisms and consequences of LiD. Little is currently known about what may be effective treatments  
28 for LiD, although some that have been proposed show promise, including computer-based training (Loo  
29 et al. 2016; Weihing et al. 2015), classroom amplification (Rosenberg 2002; Johnston et al. 2009; Keith  
30 and Purdy 2014), and low-gain or remote microphone hearing aids (Keith and Purdy 2014; Schafer et al.  
31 2014)). Persistent LiD may have a more significant impact on the individual, family, and society over a  
32 long time. More comprehensive assessment and more aggressive treatment strategies may therefore be  
33 warranted.

1 Young adults with a history of LiD in childhood reported continuing communication difficulty almost  
2 10 years after a clinical diagnosis (Del Zoppo et al. 2015). Still, longitudinal quantitative data on listening,  
3 auditory, and cognitive abilities in children with earlier LiD is lacking. We hypothesized that LiD would  
4 be long-lasting because LiD was seen across ages (between 6 and 13 years old) in our previous cross-  
5 sectional data (Petley et al., 2021) and because of the general persistence through adolescence or into  
6 adulthood of other associated developmental problems of attention (Hechtman et al. 2016; Roy et al.  
7 2017), reading (Shaywitz et al. 1999; Lohvansuu et al. 2021), and language (St Clair et al. 2011).

8 For both cross-sectional and longitudinal research, the reliability of measures is critical for accurate  
9 evaluation. One specific issue recently identified was the reliability of the NIH Cognition Toolbox  
10 (Taylor et al. 2020), a test suite inspired by a desire for greater standardization of neurobehavioral tests  
11 (Weintraub et al. 2013b). As a secondary aim, we assessed long-term test-retest reliabilities of the NIH  
12 Cognition Toolbox and other auditory measures (ECLiPS, LiSN-S) we previously examined. Finally,  
13 building on a model that explained 42% of the variance in our cross-sectional data (Petley et al. 2021), we  
14 aimed to develop an enhanced model using longitudinal data that better characterizes LiD.

15

## 16 **MATERIALS AND METHODS**

17 The Institutional Review Board of Cincinnati Children's Hospital (CCH) Research Foundation  
18 approved this study.

### 19 **Participants**

20 The LiD group's eligibility requirements included caregiver-reported listening difficulties (see  
21 Procedure), age between 6 and 13 years old upon enrollment, English native language, and the absence of  
22 any otologic, neurologic, psychiatric, or intellectual inability to complete testing procedures (Petley et al.  
23 2021). Typically developing (TD) participants were eligible based on the same criteria. Additionally, they  
24 could not have any caregiver-reported listening difficulties, developmental delay, language, attention, or  
25 learning disorder.

26 One hundred sixty-six participants (74 with LiD, 92 TD) were enrolled; 19 withdrew or otherwise  
27 exited the study (6 with LiD, 13 TD). The remaining 147 participants (68 with LiD, 79 TD) completed the  
28 assessments at baseline (Wave 1). After the initial study visit, we contacted the participants after ~2 years  
29 (Wave 2) and 4 years (Wave 3) to collect longitudinal data. A total of 100 (52 with LiD, 48 TD) and 31  
30 (16 with LiD, 15 TD) participated in Wave 2 and 3, respectively (Table 1). The sample size for Wave 3  
31 was notably smaller than other waves, partly because of the COVID-19 pandemic. Due to attrition and  
32 updates to testing procedures, the sample size for each assessment was variable (see Table 1). All  
33 participants had clinically normal hearing bilaterally, as detailed below.

34

## 1 **Procedure**

2 The recruitment procedure and test details are described in our previous reports (Petley et al. 2021;  
3 Moore et al. 2018; Hunter et al. 2021). Briefly, participants with LiD were recruited from Cincinnati  
4 Children’s Hospital and the broader community. Those who opted in completed (i) a consent form, (ii) the  
5 background questionnaire, and (iii) the ECLiPS (Barry and Moore 2021) to confirm eligibility for the LiD  
6 or TD group. According to institutional policy, children aged 11 and above were also assented using a  
7 child-friendly version of the consent document. All participants received financial compensation for their  
8 participation. During the study visit, each participant completed various behavioral and audiological  
9 testing.

## 11 **Background Questionnaire**

12 This questionnaire asked about the participant’s medical history, parental education, and  
13 demographic information. Key variables were date of birth, language, race and ethnicity, maternal  
14 education (a proxy for socioeconomic position (Sherar et al. 2016)), history of ear and hearing problems  
15 (including pressure equalization, PE, tube placement), diagnosis of, or treatment for, learning problems  
16 (attention disorders, developmental delays, speech-language disorders), neurological (e.g., history of head  
17 trauma) or psychiatric conditions, school interventions, and birth history (prematurity, NICU stay).  
18 Demographic variables, including maternal education, age, gender, and race, obtained from this  
19 questionnaire, are summarized at each time point in Table 1 for the LiD and TD groups.

## 21 **Caregiver Evaluation of Children’s Listening**

22 The ECLiPS (Barry and Moore 2021) was completed in each wave to profile participants’  
23 listening and communication abilities. It contains 38 simple statements (items) describing behaviors  
24 commonly observed in children. Caregivers were asked to rate their child by how much they agreed with  
25 each statement on a five-point scale ranging from strongly disagree to strongly agree. The ratings were  
26 averaged to derive scores, which were scaled by age, on five subscales (speech and auditory processing  
27 [SAP], environmental and auditory sensitivity [EAS], language/literacy/laterality [L/L/L], memory and  
28 attention [M&A], and pragmatic and social skills [PSS]), each containing 6 to 9 distinct items. These  
29 scales were further collected under Language, Listening, Social, and Total aggregate (composite) scores.  
30 All scales and composites were standardized for a population mean of 10 (SD = 3) based on British data  
31 (Barry et al. 2015). All of the subscales of the ECLiPS have high test-retest reliability, with intraclass  
32 correlations (ICCs) above 0.8 (Barry and Moore 2021). Construct validity has been demonstrated through  
33 convergence with other established tests that measure similar skills, including the Children’s Auditory

1 Processing Performance Scale (CHAPS; (Smoski et al. 1998)), the CCC-2 (Bishop 2006), and the Social  
2 Communication Questionnaire (Rutter et al. 2003).

3

#### 4 **Audiometry**

5 All participants received a full pure-tone hearing threshold assessment at octave intervals from  
6 0.25 to 16 kHz (plus 10 and 12 kHz), bilaterally, using Sennheiser HAD 300 headphones and a modified  
7 Hughson-Westlake procedure (see (Hunter et al. 2021)). Participants with elevated thresholds (>20 dB  
8 HL) in either ear and at any standard clinical frequency (0.25 - 8 kHz) were excluded and referred for  
9 further clinical care as appropriate.

10

#### 11 **Speech in Speech Hearing (LiSN-S)**

12 The Listening in Spatialized Noise – Sentences (LiSN-S) test (Cameron and Dillon 2007; Brown  
13 et al. 2010) measures the ability to listen and repeat simple, spoken sentences in the presence of  
14 distracting sentences, developed using the same child-friendly criteria as the BKB sentences (Bench et al.  
15 1979). The LiSN-S (US Edition (Brown et al. 2010)) was administered at each wave using a commercial  
16 CD played on a laptop, a task-specific soundcard, and Sennheiser HD 215 headphones. Participants were  
17 asked to repeat a series of target sentences (“T”), presented using virtual space generic head-related  
18 transfer functions (Humanski and Butler 1988), directly in front (0°: diotic) while ignoring two distracting  
19 speakers (“D1”, “D2”). There are four listening conditions in which the distractors change voice (different  
20 or same as target) and/or position (0° and 90°) (Humanski and Butler 1988). The LiSN-S is adaptive; the  
21 level of the target speaker decreases or increases in SNR relative to the distracting speech if the listener  
22 responds correctly or incorrectly during up to 30 sentences in each condition. The speech reception  
23 threshold (SRT) represents 50% correct SNR for the condition. The Low Cue condition is where  
24 distractors are in the same voice as the target and 0° relative to the listener. Distractors are in different  
25 voices and ±90° relative to the listener in the High Cue condition. The derived scores of the LiSN-S are  
26 the Talker Advantage and Spatial Advantage, so-called because each is the difference between SRTs from  
27 two conditions. This subtraction process should, to varying extent, separate auditory from cognitive  
28 influences (Petley et al. 2021). Spatial Advantage thus represents the participant’s ability to separate the  
29 spatial source of the speech using purely auditory cues, while Talker Advantage demonstrates the  
30 participant’s ability to distinguish individual talkers, which involves both acoustic and linguistic  
31 information (Perrachione et al. 2011; Quinto et al. 2020). Test-retest comparisons for the four listening  
32 conditions of the LiSN-S showed significant improvement from the first test to the second but no  
33 differences in the advantage scores (Cameron et al. 2011).

1 A spatial “Pattern Score” is a quantitative clinical measure of the benefit of adding virtual spatial  
2 cues to the information in the Low Cue condition of the LiSN-S (i.e., target and distracting stimuli  
3 presented diotically) (Cameron and Dillon 2011). The Pattern Score has been used as both a diagnostic  
4 score and a treatment outcome for a specific auditory disorder termed Spatial Processing Disorder (SPD)  
5 (Cameron et al. 2011, 2012; Cameron et al. 2014).

### 6 7 **Cognition (National Institutes of Health, NIH Toolbox)**

8 Each participant’s cognitive skills were assessed using the NIH Toolbox for the Assessment of  
9 Neurological and Behavioral Function, Cognition Domain (Weintraub et al. 2013a; Weintraub et al.  
10 2013b). According to Toolbox recommendations, participants completed testing online or via an iPad app  
11 in a private sound-attenuated booth or a quiet room at each wave. The Toolbox contains up to eight  
12 standardized cognitive instruments measuring different aspects of fluid or crystallized reasoning. The  
13 precise composition of the testing battery depends on user choice and participant age.

14 All participants in this study completed the Picture Vocabulary Test (PVT), Flanker Inhibitory  
15 Control and Attention Test (Flanker), Dimensional Change Card Sort test (DCCS), and Picture Sequence  
16 Memory test (PSMT). Each test produced a US age-corrected standardized score, and the scores of all  
17 four tests combine to calculate a single Early Childhood Composite. The PVT is an adaptive test in which  
18 the participants are presented with an audio recording of a word and select which of the four pictures most  
19 closely matches the word’s meaning. In the Flanker, which tests inhibition/attention, the participant  
20 reports the direction of a central visual stimulus (left or right, fish or arrow) in a string of five similar,  
21 flanking stimuli that may be congruent (same direction as target) or incongruent (opposite direction). The  
22 DCCS tests cognitive flexibility (attention switching). Target and test card stimuli vary along two  
23 dimensions, shape and color. Participants are asked to match test cards to the target card according to a  
24 specified dimension that varies for each trial. Both the PVT and DCCS score accuracy and reaction time.  
25 PSMT assesses episodic memory by presenting an increasing number of illustrated objects and activities,  
26 each with a corresponding audio-recorded descriptive phrase. Picture sequences vary in length from 6 to  
27 18 pictures depending on age, and participants are scored on the cumulative number of adjacent pairs  
28 remembered correctly over two learning trials. The Early Childhood Composite (ECC) obtained by  
29 combining these scores is a measure of overall cognitive skill for children 6 years and older.

30 Children at least 8 years of age qualify for additional subtests from the Toolbox, contributing to a  
31 Total Composite (TC) measure of general cognitive skill. These additional tests were administered to all  
32 children 8 years of age and older (i.e., all children for Waves 2 and 3). Fluid Composite measures are the  
33 list sorting working memory (LSWM), the pattern comparison processing speed (PCPS) tests, and the  
34 DCCS, Flanker, and PSMT. LSWM assesses working memory by asking participants to arrange objects

1 presented visually and auditorily (food and animals) in order of size. PCPS requires participants to  
2 respond as quickly as possible to whether two visually presented cards are the same or different.  
3 Participants completed the Reading Recognition (RR) test in addition to the PVT for the Crystallized  
4 Composite measure. The RR requires participants to read words and letters aloud.

5 The Toolbox tests demonstrate high reliability in pediatric samples with short testing intervals  
6 between 7 and 21 days, with intraclass correlations (ICCs) between 0.76 and 0.99 (Weintraub et al.  
7 2013b). Recent evidence suggests that their reliability over longer test-retest intervals (1 to 2 years) is  
8 substantially lower, with ICCs between 0.24 and 0.85 (Taylor et al. 2020). The convergent validity of the  
9 Toolbox has been assessed against a range of published tests used in clinical practice that measure similar  
10 cognitive capacities (Weintraub et al. 2013b). These assessments yielded convergent validity correlations  
11 between 0.48 and 0.93, suggesting that the Toolbox instruments index the desired constructs.  
12

### 13 **Analysis**

14 The primary analysis was divided into three sequential parts. Part 1 examined differences  
15 between TD and LiD groups with respect to demographics, auditory, and cognitive function using the  
16 ECLiPS, LiSN-S, and NIH Cognition Toolbox. Demographic information included age, sex, race,  
17 ethnicity, and maternal education for each group. We developed mixed-effect models (Verbeke 1997;  
18 Fitzmaurice et al. 2012) for each demographic characteristic to assess differences between groups (TD  
19 and LiD) in the longitudinal data. A mixed-effect model is advantageous in analyzing longitudinal data  
20 because it accounts for various correlation structures among the repeated measures and is flexible in  
21 handling missing data. With the assumption of the data missing at random (MAR), the mixed-effect  
22 model used all the available data with Restricted Maximum Likelihood (REML) estimation. We ran  
23 Little's test (Little 1988) to assess if missing data could be assumed as missing completely at random.

24 For each demographic characteristic, we created a mixed-effect model using group (TD vs. LiD),  
25 wave (Wave 1, 2, and 3), and interaction (Group x Wave) as fixed effects and participant as a random  
26 effect. Maternal education was collapsed into four groups: up to high school education (High school),  
27 some college education (College), Bachelor's degree (Bachelor), and post-graduate education (Post-grad).  
28 Race was collapsed into two groups: white and non-white. Ethnicity was collapsed into two groups:  
29 Hispanic or Latino and others. Demographic characteristics that are statistically different between groups  
30 ( $p < .05$ ) may confound the statistical analysis that compared behavioral testing results between TD and  
31 LiD. Therefore, such demographic variables were included in the analyses to control potential  
32 confounding.

33 Next, we evaluated longitudinal changes in listening and cognitive skills of TD and LiD children  
34 using the ECLiPS sub-scores and total scaled score, LiSN-S Advantage, Cue and Pattern scores, and NIH



1 Toolbox sub-tests and composite scores. For each test, we created a mixed-effect model using group (TD  
2 vs. LiD), wave (Wave 1 vs. 2), interaction (Group x Wave), and maternal education (potential confounder)  
3 as fixed effects and participant as a random effect. We used standardized scores adjusted for age on the  
4 test date for all analyses. To control inflation, p-values were adjusted for multiple comparisons using  
5 Benjamini-Hochberg (B-H) adjustment (Benjamini and Hochberg 1995) on eight ECLiPS sub-scores,  
6 four LiSN-S scores, and seven NIH-TB sub-scores. We used false discovery rate (FDR) < 5%. We did not  
7 include Wave 3 data in these mixed-effect models because of the limited sample size relative to other  
8 waves. Instead of whole group-level comparisons, we created separate mixed-effect models using data  
9 only of Wave 3 participants to evaluate longitudinal changes among those participants.

10 The goal of Part 2 of the analysis was to evaluate the test-retest reliability of the measures. We  
11 calculated Pearson correlation coefficients and intra-class correlation coefficients (ICC) of test results  
12 between Waves 1 and 2. We calculated the coefficients for all participants and, separately, for the TD and  
13 LiD groups.

14 In Part 3, we aimed to identify the functional domains that contributed to LiD across all  
15 participants in the longitudinal data. Our prior cross-sectional study created a model that predicted 42% of  
16 the variance in ECLiPS Total scaled scores at Wave 1 (Petley et al. 2021). This model included four  
17 predictors: the SCAN-3:C Composite Score, the LiSN-S Talker Advantage score, and the NIH PV and  
18 DCCS scores. Here, we tested if this model predicted ECLiPS Total scaled scores at Wave 2. Next, we  
19 developed a new mixed effect model using the longitudinal data to predict ECLiPS Total Scaled scores.  
20 Candidate predictors were maternal education, five LiSN-S scores (Cue, Advantage, and Pattern scores),  
21 seven NIH Toolbox subtests, and four NIH Toolbox composite scores. We created separate models for  
22 subtests and composite scores for NIH Toolbox testing to avoid including repetitive test results in a model.  
23 Owing to its smaller sample size, Wave 3 was omitted from this longitudinal model.

24 All candidate predictors for the mixed-effect model for Part 3 of the analysis were first examined  
25 against the ECLiPS Total scaled score via univariate analyses using a mixed-effect model. These models  
26 used participants as a random effect. Predictor variables and the interaction term (predictor x wave) were  
27 used as fixed effects. Only variables with  $p < 0.1$  in the univariate analysis were included in the backward  
28 selection. Tukey-Kramer multiple adjustment was applied for pairwise comparisons among the levels of  
29 the significant variables. Beta weights for each predictor variable show strength of the effects on the  
30 ECLiPS Total Scaled score. Analysis used SAS version 9.4 (SAS Institute, Cary, N.C.). A two-sided  
31 significance level was set at 0.05.

## 32 33 **RESULTS**

### 34 **Group differences in caregiver-reported listening skills were maintained at Wave 2**

1 By design, all ECLiPS scores were lower in the LiD group than in the TD group at Wave 1 (Petley et al.  
2 2021) (Figure 1A; Table 2). The LiD group continued to have lower ECLiPS sub-scores and total scores  
3 than the TD group at Wave 2 (group effect,  $p < .0001$ ). The relationship between TD and LiD did not  
4 change across the two waves following B-H adjustment (wave effect for ECLiPS sub-scores,  $p = 0.01 -$   
5  $0.67$ ; Group x Wave,  $p = 0.02 - 0.91$ , B-H critical  $p$  value  $0.0063$ ).

### 6 7 **LiD group had consistently lower cognitive scores**

8 All NIH Cognition Toolbox sub-test scores and composite scores for the LiD group were significantly  
9 lower than for the TD group (group effect,  $p < .0001$ ; Figure 1B; Table 3) across Waves 1 and 2. There  
10 was no significant Group x Wave interaction following B-H adjustment ( $p = 0.01 - 0.84$ , B-H critical  $p$   
11 value  $0.0071$ ). Wave differences for the Flanker Test scores ( $p = .008$ ) were trending but not significant  
12 after B-H adjustment.

### 13 14 **LiD group had consistently lower skills in segregating sentences**

15 All LiSN-S z-scores for the LiD group were lower than the TD group across waves (Figure 1C; Table 2;  
16 group effect,  $p < .015$ ; Group x Wave,  $p = 0.12 - 1.00$ ). Across groups, Spatial Advantage scores were  
17 significantly higher at Wave 2 than at Wave 1 ( $p = .007$ ). Other LiSN-S z-scores did not differ between  
18 Waves 1 and 2. Spatial Pattern Scores did not differ significantly between groups or waves (group effect,  
19  $p = 0.41$ ; wave effect,  $p = 0.11$ ; Group x Wave,  $p = 0.86$ ). Thirteen children in Wave 1 (7 LiD, 6 TD,  $p =$   
20  $0.57$ ), but only three children in Wave 2 (LiD only,  $p = 0.24$ ) had Pattern Scores meeting the diagnostic  
21 criteria for SPD.

### 22 23 **Differences between the TD and LiD groups persisted through adolescence**

24 We assessed longitudinal changes in listening skills, speech-in-speech skills, and cognitive function  
25 across the three waves based on only those 30 participants who completed all three waves (Figure 2). All  
26 ECLiPS sub-scores and total scores in Wave 3 remained higher for the TD than the LiD group (group  
27 effect,  $p < .0001$ ), as in the main analysis of Waves 1 and 2 data. However, in contrast to the main  
28 analysis, ECLiPS SAP (wave effect  $p = .004$ ; Group x Wave,  $p = 0.18$ ) and composite Listening scores  
29 (wave effect  $p = .003$ ; Group x Wave,  $p = 0.93$ ) were significantly higher across both groups in Wave 2  
30 than Wave 1. Similarly, ECLiPS Total scores in Wave 3 were significantly higher than Wave 1 (wave  
31 effect,  $p = 0.028$ ; Group x Wave,  $p = 0.71$ ). All NIH Cognition Toolbox scores and two LiSN-S z scores  
32 (Low Cue and Talker Advantage) in the TD group were significantly higher than in the LiD group (group  
33 effect,  $p < .003$ ). There was no significant main wave effect or Group x Wave interaction for either NIH  
34 Cognition Toolbox or LiSN-S scores. In Wave 2, missing values were random (Little's  $p = 0.74$ ).

1 However, for Wave 3, missing values were non-random, suggesting systemic reasons for participant  
2 attrition (Little's  $p = 0.01$ ).

#### 4 **LiD group associated with lower maternal education**

5 Of the demographic information assessed, only maternal education was significantly lower for the LiD  
6 group ( $p < .0001$ ), with significant Group x Wave interaction (Wave 1 vs. Wave 3,  $p < .0001$ ; Table 1).  
7 Adding maternal education to the mixed-effect models comparing listening, cognitive, and auditory skills  
8 between TD and LiD did not, however, change the relationships described above, affirming that maternal  
9 education was not confounding.

#### 11 **ECLiPS and NIH-TB scores demonstrated good reliability between Waves 1 and 2**

12 Part 2 of the analysis showed ECLiPS total scaled scores had good reliability between Waves 1 and 2  
13 (Figure 3; Table 4). Reliability did not differ between TD and LiD groups (TD:  $r = 0.52$ , LiD:  $r = 0.52$ ,  $p$   
14  $= 1.000$ ). All sub-test and composite NIH Toolbox scores were significantly correlated between Waves 1  
15 and 2 (ICCs ranging from 0.48 to 0.82) and consistent between TD and LiD ( $p = 0.07 - 0.96$ ). All LiSN-S  
16 scores were significantly correlated, with a moderate agreement between waves (ICCs ranging from 0.28  
17 to 0.42).

#### 19 **Cognitive, sensory, and socioeconomic factors independently contributed to parent-reported 20 listening skills**

21 For Part 3 of the analysis, we first found the Wave 1 prediction model (Petley et al. 2021) accounted for  
22 42% of the variance of ECLiPS Total Scaled scores at Wave 2. Our new model, using the longitudinal  
23 data of both Waves 1 and 2, explained 54.8% of the variance of the ECLiPS total scaled score ( $\chi^2(2) =$   
24  $48.21$ ,  $p < 0.0001$ ). The new model included maternal education (beta 0.70, for Bachelor vs. High school  
25 maternal education groups,  $p = .0038$ ), NIH total composite score (beta 0.49,  $p < .0001$ ) and LiSN-S  
26 Spatial Advantage (beta 0.16,  $p = .0023$ ). Consistent with the importance of maternal education, the  
27 ECLiPS mean Total Scaled scores were 3.1 points higher for children in the Bachelor maternal education  
28 group than for those in the High school group.

## 30 **DISCUSSION**

### 31 **Impact of study**

32 We found that children with LiD, classified using the ECLiPS caregiver questionnaire, had  
33 persistently impaired performance across multi-year testing on auditory and cognitive tasks relative to TD  
34 children. ECLiPS scores and NIH Toolbox testing showed strong test-retest reliability across two years.

1 Caregiver-reported listening skills were independently predicted by maternal education, LiSN-S Spatial  
2 Advantage scores, and NIH Toolbox total composite scores. To our knowledge, this study is the first to  
3 show an association between the degree of childhood LiD and maternal education, independent of  
4 auditory and cognitive skills, suggesting that socioeconomic factors may make essential contributions to  
5 this poorly understood problem. Our results carry clinical significance because the long-lasting nature of  
6 childhood LiD indicates an increased impact on affected individuals that may warrant earlier and more  
7 aggressive management.

8

### 9 **Reliability**

10 A prior longitudinal study of childhood LiD was based on a self-reported questionnaire with a  
11 follow-up response rate of approximately 13% (Del Zoppo et al. 2015). The current study used a large  
12 and heterogeneous sample of children and had a follow-up rate at Wave 2 of 68%. Additionally, loss to  
13 follow-up at Wave 2 was random, suggesting a low likelihood of sampling bias. Therefore, findings from  
14 Waves 1 and 2 likely represent the typical progression of LiD. Unfortunately, due to COVID, the follow-  
15 up rate of Wave 3 dropped significantly, and sampling bias was introduced. A separate longitudinal  
16 analysis of Wave 3 participants showed overall longer-term results that were consistent with the primary  
17 analysis of Waves 1 and 2.

18 All ECLiPS, LiSN-S, and NIH Toolbox scores showed a statistically significant correlation  
19 between Waves 1 and 2. These correlations remained significant in the sub-group analysis performed  
20 separately in the TD and LiD groups. The high reliability of the Toolbox scores found here, despite long  
21 testing intervals of 2 years, appears to allay other recent concerns about these scores (Taylor et al. 2020).  
22 This may be attributable to our consistent testing procedure, conducted by research staff at a single site,  
23 compared to testing involving multiple sites (Taylor et al. 2020). LiSN-S age-adjusted scores were also  
24 significantly correlated between Waves 1 and 2. However, the agreement between waves varied from  
25 poor to good, and correlation coefficients were overall lower than in a previous study (Cameron et al.  
26 2011). The higher retest reliability for that previous study may be explained by its shorter testing intervals  
27 (2-4 months) and older (above 12 years old) participants (Cameron et al. 2011).

28

### 29 **Persistent listening challenges**

30 ECLiPS scores of TD children were consistent with a prior study (Barry et al. 2015), indicating  
31 that the significant difference between TD and LiD was due to persistent listening challenges in LiD  
32 rather than a supra-normal performance of the TD group. The protracted, poorer performance of the LiD  
33 group, also reported in other developmental learning disabilities, suggests that existing management  
34 strategies aren't adequately addressing these children's challenges. In separate work (Hunter et al., in

1 preparation), we found more than half the children in the LiD group had been referred to CCH for  
2 specialist assessment and received interventions before and/or during the study period. Intervention  
3 efficacy needs to be evaluated separately in a future research study using quantitative outcome measures  
4 specific to each treatment. Secondary analysis of Wave 3 participants showed improved ECLiPS scores at  
5 Waves 2 and 3 compared to Wave 1 but without a Group x Wave interaction. This suggests that both  
6 groups' listening skills improved over time, relative to published norms (Barry and Moore 2021), which  
7 may be interpreted as accelerated development within this specific cohort.

8

### 9 **Cognitive challenges**

10 One of the striking findings of our study was a persistent cognitive challenge of the LiD group  
11 across all the domains tested by the NIH Toolbox. Our prior study showed an association between LiD  
12 and impaired cognition at Wave 1 (Petley et al. 2021). The findings of the current study were even more  
13 robust because we showed this association in the longitudinal data and across all the NIH Toolbox  
14 subscale and composite scores. Our prediction model identified NIH Total Composite score as the single  
15 most predictive cognitive measure over any combination of NIH Toolbox subscales, confirming the broad  
16 cognitive challenges associated with LiD. A recent review has suggested that an intervention strategy for  
17 treating LiD should be deficit-specific (Dillon and Cameron 2021). While attractive in principle, the  
18 results presented here suggest that such a strategy may need to employ an unrealistically large number of  
19 interventions. An alternate approach may be to identify and remediate LiD in infancy, as is currently  
20 under investigation for childhood language (Ferjan Ramirez et al. 2020) and autism spectrum disorders  
21 (Whitehouse et al. 2021).

22

### 23 **Spatial hearing**

24 In the main analysis of Wave 1 and 2 data, all LiSN-S age-adjusted scores were higher in the TD  
25 than in the LiD group. This shows that children with LiD have challenges in both the auditory and  
26 cognitive processing represented in the Cue and Advantage scores. In our cross-sectional study of Wave 1  
27 data, TD children scored significantly higher only in the LiSN-S Low Cue and Talker Advantage scores  
28 (Petley et al., 2021). Interestingly, in the secondary analysis of Wave 3 participants in the current study,  
29 children with LiD scored lower in Low Cue and Talker Advantage only, similar to the prior study. Taken  
30 together, the data suggest that Low Cue and Talker Advantage may be more sensitive measures for  
31 differentiating TD and LiD than other LiSN-S scores.

32

33 Although the number of cases was small, the prevalence of SPD decreased at Wave 2, despite  
34 persistent listening, auditory, and cognitive challenges in the LiD group. Moreover, none of the  
participants received specific treatment for SPD (Cameron et al. 2012). These findings indicate that SPD

1 may be a developmentally transient condition. Furthermore, neither the Pattern score nor the frequency of  
2 SPD differed significantly between the TD and LiD groups, suggesting that SPD does not represent the  
3 listening problems identified by the ECLiPS (Petley et al. 2021). Future research clarifying the clinical  
4 significance and natural history of SPD would be beneficial. Among LiSN-S scores, only the Spatial  
5 Advantage age-adjusted scores increased significantly from Waves 1 to 2 in both groups. This could be  
6 due to developmental changes or inconsistent normalization and is unlikely to be training effects after a 2-  
7 year separation between tests.

8

### 9 **Prediction model**

10 Using a longitudinal design and a data-driven approach, we developed a model explaining the  
11 degree of listening difficulty with greater accuracy than in our prior study (Petley et al. 2021). In the new  
12 model, Talker Advantage provided less independent information about listening difficulty than Spatial  
13 Advantage. Similarly, maternal education independently contributed to the model that includes NIH  
14 Toolbox total composite and Spatial Advantage. Our final model seems plausible because it consists of  
15 auditory, cognitive, and social factors.

16

### 17 **Socioeconomic factors in listening difficulties**

18 To our knowledge, the current study is the first to show the independent contribution of  
19 socioeconomic factors to listening skills in children with LiD or APD. Prior studies showed maternal  
20 education is associated with early childhood development (Jeong et al. 2017), children's academic  
21 outcomes (Harding et al. 2015), language skills (Magnuson et al. 2009), attention problems (Hjern et al.  
22 2010), and auditory brainstem responses (Skoe et al. 2013). It is, therefore, unsurprising that maternal  
23 education was associated with the degree of LiD, potentially through multiple pathways. However, the  
24 finding of our study is most noteworthy because the degree of LiD was associated with maternal  
25 education independent of cognitive and sensory functions. Maternal education and socioeconomic factors  
26 should be a part of the evaluation of children with LiD. A further study investigating the mechanisms  
27 connecting socioeconomic factors with LiD is warranted.

28

### 29 **Limitations**

30 There are several limitations to our study. Due to the small sample size of Wave 3, we ran a  
31 separate analysis focusing on longitudinal changes of Wave 3 participants to reduce sampling bias.  
32 Though this method reduced bias, the analysis remained underpowered. Comprehensive and conventional  
33 auditory processing testing, such as the SCAN-3, was lacking in Waves 2 and 3. Despite these limitations,  
34 our findings are significant because we showed long-lasting challenges of childhood LiD that may

1 influence clinical management strategy, and we identified an essential social factor independently  
2 contributing to LiD.

3

#### 4 **Conclusion**

5 Children with LiD and clinically normal audiograms have persistent auditory, listening, and  
6 cognitive challenges through at least early adolescence. The degree of LiD can be independently  
7 predicted by maternal education, cognitive processing, and spatial listening skills.

8

#### 9 **ACKNOWLEDGEMENTS**

10 This research was supported by grant 5R01DC014078 from the National Institute of Deafness and other  
11 Communication Disorders (DRM), 2UL1TR001425-05A1 by the National Center for Advancing  
12 Translational Sciences of the National Institutes of Health (KK), and by the Cincinnati Children's  
13 Research Foundation. DRM received support from NIHR Manchester Biomedical Research Centre.

14

15

1 **Table 1. Participant numbers and demographic information**

|                                   | Wave 1    |           | Wave 2     |            | Wave 3     |            |
|-----------------------------------|-----------|-----------|------------|------------|------------|------------|
|                                   | TD        | LiD       | TD         | LiD        | TD         | LiD        |
| N                                 | 79        | 68        | 48         | 52         | 15         | 16         |
| Age, year (SD)                    | 9.3 (2.0) | 9.7 (1.9) | 12.1 (2.2) | 11.9 (2.0) | 13.4 (1.9) | 14.5 (2.2) |
| Female, n (%)                     | 33 (42)   | 24 (35)   | 24 (50)    | 16 (31)    | 6 (40)     | 6 (38)     |
| Maternal education, n (%)         |           |           |            |            |            |            |
| High school                       | 1 (1)     | 12 (18)   | 1 (2)      | 9 (18.4)   | 0 (0)      | 3 (19)     |
| College                           | 8 (10)    | 17 (25)   | 3 (6)      | 15 (30.6)  | 0 (0)      | 6 (38)     |
| Bachelor                          | 50 (63)   | 25 (37)   | 31 (65)    | 16 (32.7)  | 11 (73)    | 3 (19)     |
| Post-grad                         | 20 (25)   | 14 (21)   | 13 (27)    | 9 (18.4)   | 4 (27)     | 4 (25)     |
| Race, non-white (%)               | 13 (16)   | 17 (25)   | 5 (10)     | 16 (31)    | 1 (7)      | 9 (56)     |
| Ethnicity, Hispanic or Latino (%) | 3 (4)     | 4 (6)     | 2 (4)      | 3 (6)      | 1 (7)      | 2 (12)     |

2



1 **Table 2. Auditory and listening test scores**

| Testing measures*                      | Wave 1          |                 | Wave 2         |                 | Wave 3         |                 |
|----------------------------------------|-----------------|-----------------|----------------|-----------------|----------------|-----------------|
|                                        | TD              | LiD             | TD             | LiD             | TD             | LiD             |
|                                        | n = 79          | n = 67          | n = 47         | n = 49          | n = 13         | n = 15          |
| <b>ECLiPS scores</b>                   |                 |                 |                |                 |                |                 |
| Speech and auditory processing         | 10.4<br>(1.7)   | 3.0<br>(1.7)    | 10.5<br>(2.5)  | 4.2<br>(2.6)    | 11.4<br>(2.2)  | 6.0<br>(3.3)    |
| Environmental and auditory sensitivity | 10.8<br>(2.5)   | 4.8<br>(2.6)    | 9.8 (2.7)      | 4.9<br>(2.7)    | 10.6<br>(3.1)  | 7.9<br>(3.2)    |
| Language/literacy/laterality           | 10.5<br>(2.8)   | 3.9<br>(2.4)    | 10.2<br>(2.6)  | 3.9<br>(2.4)    | 10.9<br>(2.2)  | 4.9<br>(2.8)    |
| Memory and attention                   | 10.7<br>(2.5)   | 4.2<br>(2.0)    | 10.8<br>(3.0)  | 4.8<br>(2.7)    | 12.2<br>(3.5)  | 6.5<br>(3.4)    |
| Pragmatic and social skills            | 10.9<br>(2.4)   | 5.1<br>(1.8)    | 10.9<br>(2.4)  | 5.7<br>(2.2)    | 12.1<br>(3.1)  | 7.9<br>(3.4)    |
| Language                               | 10.6<br>(2.4)   | 3.6<br>(2.1)    | 10.6<br>(2.9)  | 3.8<br>(2.4)    | 11.8<br>(3.2)  | 5.3<br>(2.9)    |
| Listening                              | 10.7<br>(2.4)   | 3.4<br>(1.7)    | 10.8<br>(2.6)  | 4.2<br>(2.3)    | 12.1<br>(3.1)  | 6.3<br>(3.4)    |
| Social                                 | 11.0<br>(2.4)   | 3.6<br>(2.1)    | 10.6<br>(2.9)  | 3.8<br>(2.4)    | 11.6<br>(3.4)  | 7.7<br>(3.6)    |
| Total                                  | 10.8<br>(2.4)   | 3.0<br>(1.8)    | 10.5<br>(2.7)  | 3.5<br>(2.3)    | 11.8<br>(3.1)  | 5.9<br>(3.2)    |
| <b>LiSN-S scores</b>                   |                 |                 |                |                 |                |                 |
|                                        | n = 76          | n = 65          | n = 43         | n = 47          | n = 15         | n = 15          |
| Low Cue, z score                       | -0.13<br>(1.00) | -0.76<br>(1.18) | 0.16<br>(1.16) | -0.96<br>(1.10) | 0.33<br>(1.32) | -0.87<br>(1.08) |
| High Cue, z score                      | 0.28<br>(1.04)  | -0.39<br>(1.32) | 0.43<br>(0.81) | -0.31<br>(1.26) | 0.68<br>(0.91) | 0.25<br>(1.10)  |
| Talker Advantage, z score              | -0.05<br>(0.81) | -0.54<br>(0.99) | 0.20<br>(0.95) | -0.34<br>(0.96) | 0.55<br>(1.05) | -0.55<br>(1.01) |
| Spatial Advantage, z score             | -0.23<br>(1.36) | -0.66<br>(1.69) | 0.24<br>(1.20) | -0.29<br>(1.52) | 0.60<br>(1.07) | -0.17<br>(0.88) |
| Pattern Score                          | 7.43<br>(1.83)  | 7.25<br>(2.14)  | 7.79<br>(1.13) | 7.64<br>(2.09)  | 8.28<br>(1.46) | 8.76<br>(1.23)  |

2 \*All values are mean (SD) unless otherwise noted.

3  
4  
5  
6  
7  
8

1 **Table 3. Cognitive test scores**

| Testing measures*                                     | Wave 1   |         | Wave 2   |         | Wave 3   |         |
|-------------------------------------------------------|----------|---------|----------|---------|----------|---------|
|                                                       | TD       | LiD     | TD       | LiD     | TD       | LiD     |
| NIH Cognition Toolbox Composite Scores                | n = 56   | n = 49  | n = 42   | n = 45  | n = 15   | n = 15  |
| Picture vocabulary                                    | 114 (14) | 98 (13) | 112 (14) | 93 (11) | 113 (15) | 91(16)  |
| Flanker test                                          | 101(15)  | 90 (14) | 98 (12)  | 86 (14) | 107 (15) | 80 (12) |
| List sorting working memory <sup>†</sup>              | 110 (15) | 94 (14) | 110 (14) | 92 (13) | 117 (15) | 89 (12) |
| Dimensional change card sort test                     | 104 (15) | 89 (13) | 108 (19) | 90 (15) | 113 (21) | 89 (17) |
| Pattern comparison processing speed test <sup>†</sup> | 103 (22) | 87 (20) | 115 (22) | 86 (22) | 123 (19) | 90 (22) |
| Picture sequence memory test                          | 112 (19) | 95 (20) | 113 (18) | 99 (13) | 128 (17) | 95 (14) |
| Oral reading recognition test <sup>†</sup>            | 107 (13) | 90 (12) | 110 (12) | 92 (11) | 106 (14) | 85 (11) |
| Fluid cognition composite <sup>†</sup>                | 109 (18) | 85 (17) | 114 (17) | 84 (17) | 126 (14) | 81 (18) |
| Crystallized cognition composite <sup>†</sup>         | 112 (14) | 93 (12) | 113 (13) | 91 (10) | 111 (15) | 86 (14) |
| Total composite <sup>†</sup>                          | 112 (15) | 87 (14) | 116 (15) | 85 (13) | 123 (15) | 80 (15) |
| Early Childhood composite                             | 112 (16) | 89 (14) | 112 (16) | 87 (13) | 122 (16) | 82 (18) |

2 \*All values are mean (SD) unless otherwise noted.

3 †Data missing for 9 children in Wave 1 (TD: n = 51, LiD: n = 45).

4

5

6

1 **Table 4. Pearson correlation coefficients and estimated reliability coefficients between waves 1 and**  
 2 **2**

|                                          | Pearson correlation coefficient | ICC (95%CI), Unadjusted | ICC (95%CI), Adjusted by Wave |
|------------------------------------------|---------------------------------|-------------------------|-------------------------------|
| ECLIPS total scaled score                | 0.85                            | 0.86 (0.80, 0.90)       | 0.86 (0.80, 0.90)             |
| LiSN-S, z score                          |                                 |                         |                               |
| Low Cue                                  | 0.29                            | 0.27 (0.13-0.49)        | 0.28 (0.13-0.49)              |
| High Cue                                 | 0.35                            | 0.32 (0.17-0.52)        | 0.33 (0.18-0.53)              |
| Talker advantage                         | 0.32                            | 0.29 (0.14-0.51)        | 0.33 (0.17-0.54)              |
| Spatial Advantage                        | 0.45                            | 0.39 (0.24-0.56)        | 0.42 (0.27-0.58)              |
| NIH-toolbox age-corrected standard score |                                 |                         |                               |
| Picture vocabulary                       | 0.66                            | 0.65 (0.51-0.77)        | 0.65 (0.52-0.77)              |
| Flanker test                             | 0.51                            | 0.42 (0.26-0.60)        | 0.48 (0.32-0.64)              |
| List sorting working memory              | 0.66                            | 0.68 (0.53-0.79)        | 0.68 (0.55-0.80)              |
| Dimensional change card sort test        | 0.48                            | 0.53 (0.35-0.69)        | 0.52 (0.35-0.69)              |
| Pattern comparison processing speed test | 0.58                            | 0.56 (0.40-0.71)        | 0.56 (0.40-0.70)              |
| Picture sequence memory test             | 0.44                            | 0.45 (0.27-0.64)        | 0.45 (0.27-0.64)              |
| Oral reading recognition test            | 0.70                            | 0.68 (0.54-0.79)        | 0.70 (0.57-0.80)              |
| Fluid cognition composite                | 0.74                            | 0.75 (0.64-0.84)        | 0.76 (0.64-0.84)              |
| Crystallized cognition composite         | 0.80                            | 0.79 (0.69-0.86)        | 0.79 (0.69-0.86)              |
| Total composite                          | 0.82                            | 0.82 (0.73-0.88)        | 0.82 (0.74-0.88)              |
| Early childhood composite                | 0.73                            | 0.73 (0.61-0.82)        | 0.74 (0.63-0.83)              |

3  
4  
5  
6  
7  
8  
9  
10  
11  
12

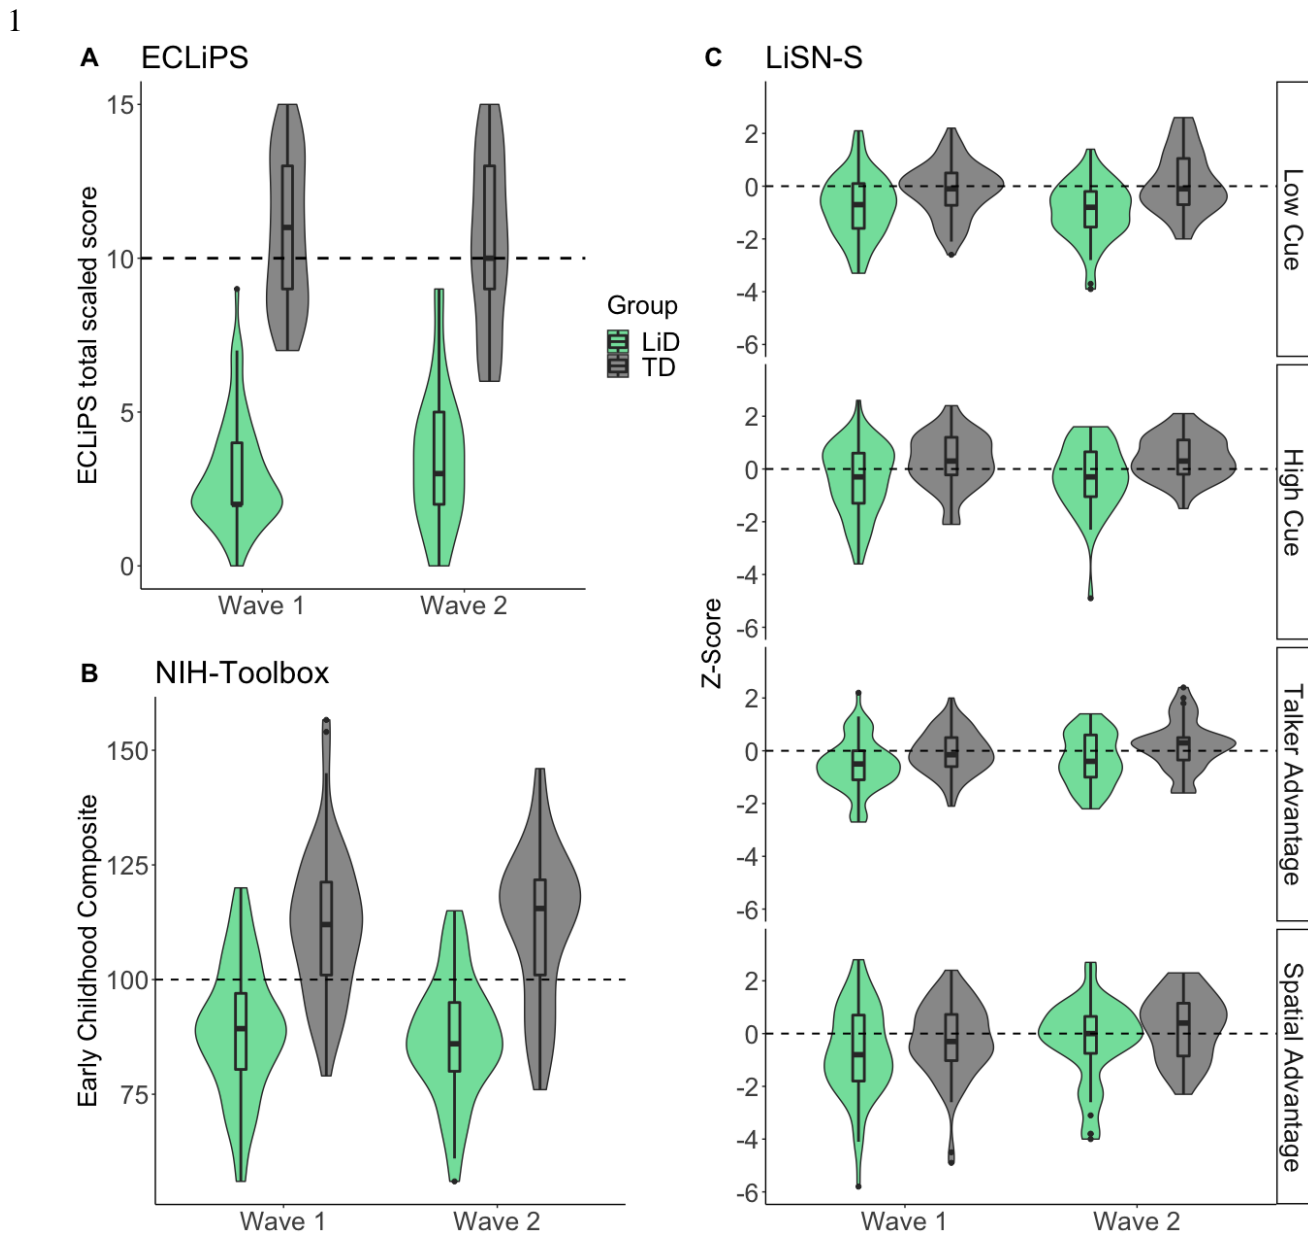

2  
3 **Figure 1. All test scores were consistently lower in the LiD group across Waves 1 and 2.** A. Violin  
4 plots of ECLiPS total scaled scores show the probability density of the data. Violin plots are overlaid with  
5 boxplots indicating each group's median and interquartile range in Waves 1 and 2. The horizontal dashed  
6 line reflects the expected standard score (here, 10). Wave 3 data are not included in the figure due to the  
7 significantly smaller sample compared with Waves 1 and 2 (see Tables 1-3). B. Early Childhood  
8 Composite scores from the NIH Cognition Toolbox. C. LiSN-S Cue and Advantage scaled Z-Scores. LiD  
9 indicates listening difficulty; TD, typically developing.

1

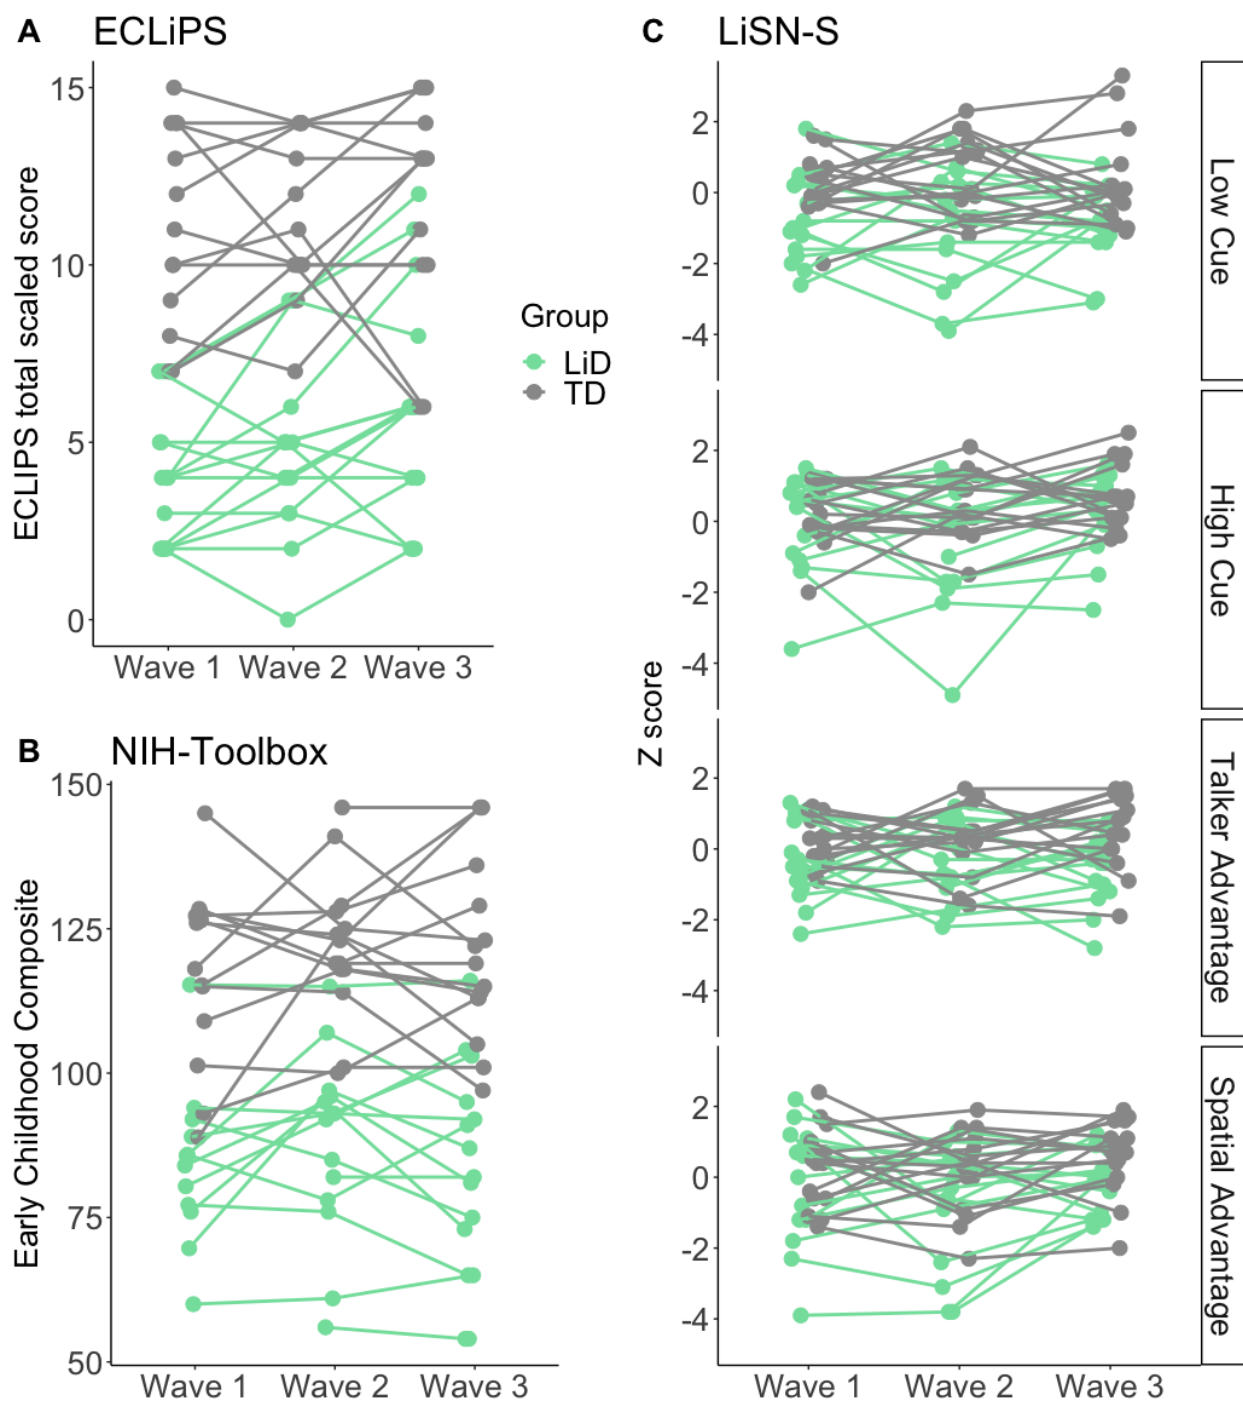

2

3 **Figure 2. Individual data of Wave 3 participants showed improved listening skills over 3 waves. A.**

4 Line plots of ECLiPS total scaled scores across 4 years. **B.** Same as A for NIH-Toolbox Early Childhood

5 Composite scaled scores. **C.** Same as A for LiSN-S Cue and Advantage scores. LiD indicates listening

6 difficulty; TD, typically developing.

1

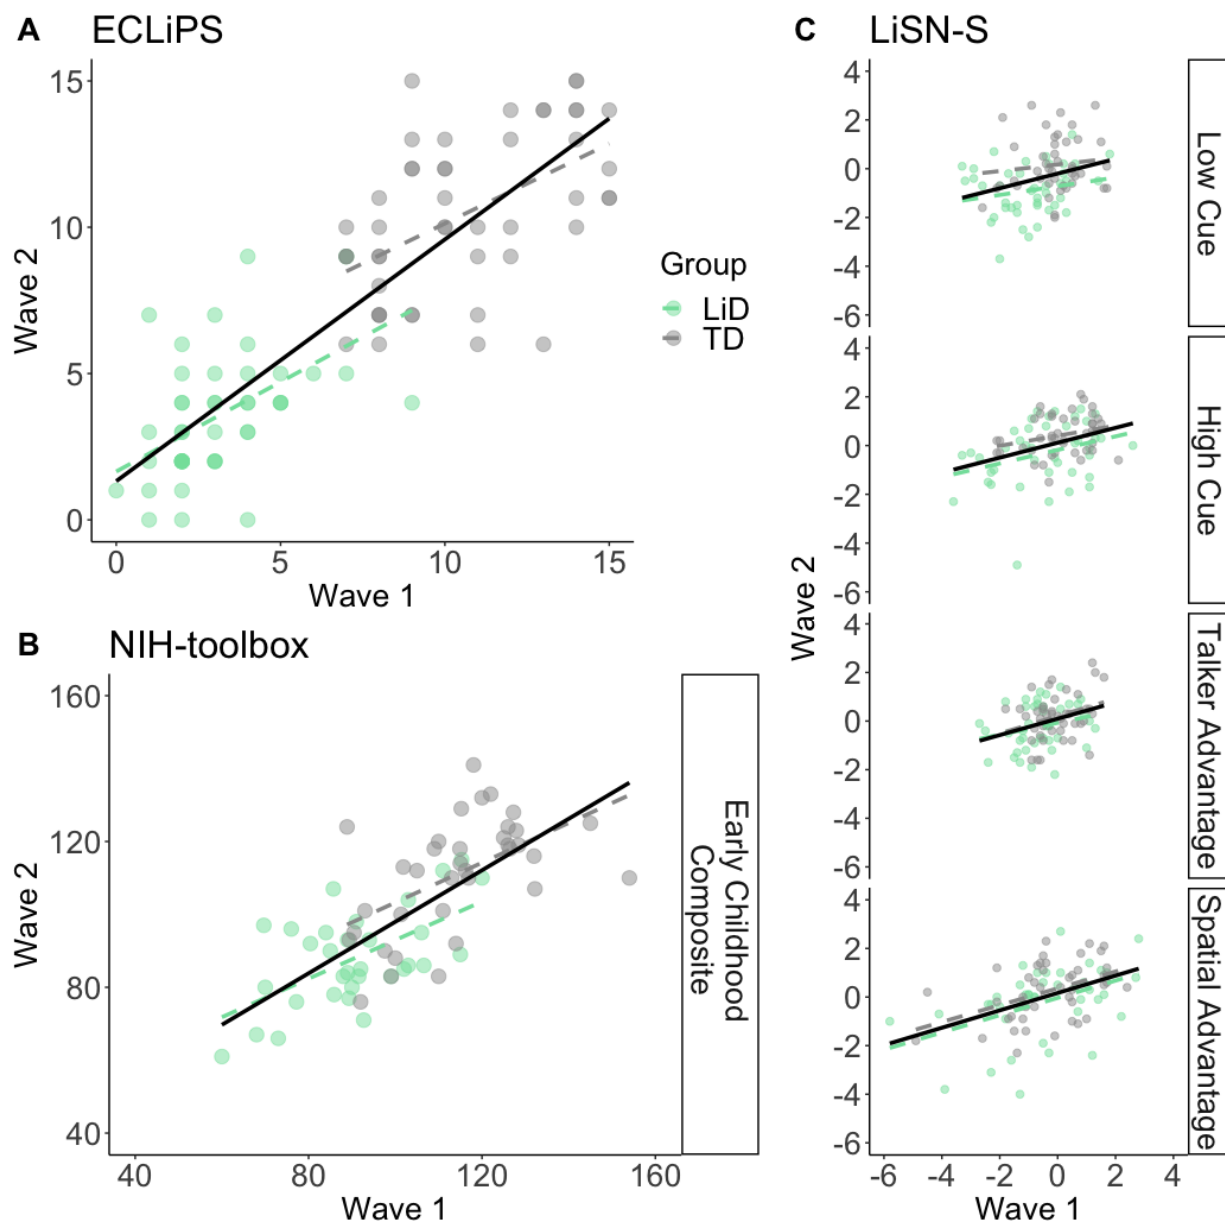

2

3 **Figure 3.** Listening skills and cognitive abilities showed moderate to excellent correlations between  
4 Waves 1 and 2. Auditory skills showed poor agreement between waves. **A.** Scatter plots of ECLiPS total  
5 scaled scores at Wave 1 and 2. Dashed lines show regression lines for each group. The black line  
6 indicates the regression line for the entire data combining groups. **B.** Same as A for Early Childhood  
7 Composite. **C.** Same as A for LiSN-S Cue and Advantage scores. LiD indicates listening difficulty; TD,  
8 typically developing.

## 1 REFERENCES

- 2 Azouz, Hanan Galal, Mona Khalil, Rania M Abdou, and Mohamed Sakr. 2014. 'The correlation  
3 between central auditory processing in autistic children and their language processing  
4 abilities', *International Journal of Pediatric Otorhinolaryngology*, 78: 2297-300.
- 5 Barry, J. G., and D. R. Moore. 2021. 'ECLIPS: Evaluation of children's listening and processing  
6 skills (2nd ed.)', *Cincinnati Children's Hospital*.
- 7 Barry, J. G., D. Tomlin, D. R. Moore, and H. Dillon. 2015. 'Use of Questionnaire-Based  
8 Measures in the Assessment of Listening Difficulties in School-Aged Children', *Ear  
9 Hear*, 36: e300-13.
- 10 Bench, J., A. Kowal, and J. Bamford. 1979. 'The BKB (Bamford-Kowal-Bench) sentence lists  
11 for partially-hearing children', *Br J Audiol*, 13: 108-12.
- 12 Benjamini, Yoav, and Yocef Hochberg. 1995. 'Controlling the false discovery rate: a practical and  
13 powerful approach to multiple testing', *Journal of the Royal statistical society: series B  
14 (Methodological)*, 57: 289-300.
- 15 Bishop, Dorothy VM. 2006. *CCC-2: Children's Communication Checklist-2* (Pearson).
- 16 Boothalingam, S., D. W. Purcell, C. Allan, P. Allen, and E. Macpherson. 2019. 'Auditory  
17 Localization and Spatial Release From Masking in Children With Suspected Auditory  
18 Processing Disorder', *Ear Hear*, 40: 1187-96.
- 19 Brewer, C. C., C. K. Zalewski, K. A. King, O. Zobay, A. Riley, M. A. Ferguson, J. E. Bird, M. M.  
20 McCabe, L. J. Hood, D. Drayna, A. J. Griffith, R. J. Morell, T. B. Friedman, and D. R.  
21 Moore. 2016. 'Heritability of non-speech auditory processing skills', *Eur J Hum Genet*,  
22 24: 1137-44.
- 23 Brown, D. K., S. Cameron, J. S. Martin, C. Watson, and H. Dillon. 2010. 'The North American  
24 Listening in Spatialized Noise-Sentences test (NA LiSN-S): normative data and test-retest  
25 reliability studies for adolescents and young adults', *J Am Acad Audiol*, 21: 629-41.
- 26 Bulut, Berker, and Nuri Karasakaloglu. 2017. 'Benefiting from Listening in Vocabulary  
27 Development', *Journal of Education and Training Studies*, 5: 99-109.
- 28 Cameron, S., and H. Dillon. 2007. 'Development of the Listening in Spatialized Noise-Sentences  
29 Test (LiSN-S)', *Ear Hear*, 28: 196-211.
- 30 Cameron, S., and H. Dillon. 2011. 'Development and evaluation of the LiSN & learn auditory  
31 training software for deficit-specific remediation of binaural processing deficits in  
32 children: preliminary findings', *J Am Acad Audiol*, 22: 678-96.
- 33 Cameron, S., H. Dillon, H. Glyde, S. Kanthan, and A. Kania. 2014. 'Prevalence and remediation  
34 of spatial processing disorder (SPD) in Indigenous children in regional Australia', *Int J  
35 Audiol*, 53: 326-35.
- 36 Cameron, S., H. Glyde, and H. Dillon. 2011. 'Listening in Spatialized Noise-Sentences Test  
37 (LiSN-S): normative and retest reliability data for adolescents and adults up to 60 years  
38 of age', *J Am Acad Audiol*, 22: 697-709.
- 39 Cameron, S., H. Glyde, and H. Dillon. 2012. 'Efficacy of the LiSN & Learn auditory training  
40 software: randomized blinded controlled study', *Audiol Res*, 2: e15.
- 41 Carhart, Raymond, and James F Jerger. 1959. 'Preferred method for clinical determination of  
42 pure-tone thresholds', *Journal of speech and hearing disorders*, 24: 330-45.
- 43 Dawes, P., and D. V. Bishop. 2010. 'Psychometric profile of children with auditory processing  
44 disorder and children with dyslexia', *Arch Dis Child*, 95: 432-6.

- 1 Del Zoppo, C., L. Sanchez, and C. Lind. 2015. 'A long-term follow-up of children and  
2 adolescents referred for assessment of auditory processing disorder', *Int J Audiol*, 54:  
3 368-75.
- 4 Dillon, H., and S. Cameron. 2021. 'Separating the Causes of Listening Difficulties in Children',  
5 *Ear Hear*, 42: 1097-108.
- 6 Farah, R., V. J. Schmithorst, R. W. Keith, and S. K. Holland. 2014. 'Altered white matter  
7 microstructure underlies listening difficulties in children suspected of auditory processing  
8 disorders: a DTI study', *Brain Behav*, 4: 531-43.
- 9 Ferguson, M. A., R. L. Hall, A. Riley, and D. R. Moore. 2011. 'Communication, listening,  
10 cognitive and speech perception skills in children with auditory processing disorder  
11 (APD) or Specific Language Impairment (SLI)', *J Speech Lang Hear Res*, 54: 211-27.
- 12 Ferjan Ramirez, N., S. R. Lytle, and P. K. Kuhl. 2020. 'Parent coaching increases conversational  
13 turns and advances infant language development', *Proc Natl Acad Sci U S A*, 117: 3484-  
14 91.
- 15 Fitzmaurice, Garrett M, Nan M Laird, and James H Ware. 2012. *Applied longitudinal analysis*  
16 (John Wiley & Sons).
- 17 Fleta, Teresa. 2014. 'Active listening for second language learning in the early years.' in, *Early*  
18 *years second language education* (Routledge).
- 19 Harding, Jessica F, Pamela A Morris, and Diane Hughes. 2015. 'The relationship between  
20 maternal education and children's academic outcomes: A theoretical framework', *Journal*  
21 *of Marriage and Family*, 77: 60-76.
- 22 Hechtman, L., J. M. Swanson, M. H. Sibley, A. Stehli, E. B. Owens, J. T. Mitchell, L. E. Arnold,  
23 B. S. Molina, S. P. Hinshaw, P. S. Jensen, H. B. Abikoff, G. Perez Algorta, A. L. Howard,  
24 B. Hoza, J. Etcovitch, S. Houssais, K. D. Lakes, J. Q. Nichols, and M. T. A. Cooperative  
25 Group. 2016. 'Functional Adult Outcomes 16 Years After Childhood Diagnosis of  
26 Attention-Deficit/Hyperactivity Disorder: MTA Results', *J Am Acad Child Adolesc*  
27 *Psychiatry*, 55: 945-52 e2.
- 28 Hind, S. E., R. Haines-Bazrafshan, C. L. Benton, W. Brassington, B. Towle, and D. R. Moore.  
29 2011. 'Prevalence of clinical referrals having hearing thresholds within normal limits', *Int*  
30 *J Audiol*, 50: 708-16.
- 31 Hjern, A., G. R. Weitoft, and F. Lindblad. 2010. 'Social adversity predicts ADHD-medication in  
32 school children--a national cohort study', *Acta Paediatr*, 99: 920-4.
- 33 Humanski, R. A., and R. A. Butler. 1988. 'The contribution of the near and far ear toward  
34 localization of sound in the sagittal plane', *J Acoust Soc Am*, 83: 2300-10.
- 35 Hunter, L. L., C. M. Blankenship, L. Lin, N. T. Sloat, A. Perdew, H. Stewart, and D. R. Moore.  
36 2021. 'Peripheral Auditory Involvement in Childhood Listening Difficulty', *Ear Hear*, 42:  
37 29-41.
- 38 Jeong, Joshua, Dana Charles McCoy, and Günther Fink. 2017. 'Pathways between paternal and  
39 maternal education, caregivers' support for learning, and early child development in 44  
40 low-and middle-income countries', *Early Childhood Research Quarterly*, 41: 136-48.
- 41 Johnston, Kristin N, Andrew B John, Nicole V Kreisman, James W Hall III, Carl C Crandell,  
42 Kristin N Johnston, Andrew B John, Nicole V Kreisman, James W Hall III, and Carl C  
43 Crandell. 2009. 'Multiple benefits of personal FM system use by children with auditory  
44 processing disorder (APD)', *International Journal of Audiology*, 48: 371-83.
- 45 Keith, William J., and Suzanne C. Purdy. 2014. 'Assistive and Therapeutic Effects of  
46 Amplification for Auditory Processing Disorder', *Semin Hear*, 35: 027-38.



- 1 Little, Roderick JA. 1988. 'A test of missing completely at random for multivariate data with  
2 missing values', *Journal of the American statistical Association*, 83: 1198-202.
- 3 Lohvansuu, K., M. Torppa, T. Ahonen, K. Eklund, J. A. Hamalainen, P. H. T. Leppanen, and H.  
4 Lyytinen. 2021. 'Unveiling the Mysteries of Dyslexia-Lessons Learned from the  
5 Prospective Jyvaskyla Longitudinal Study of Dyslexia', *Brain Sci*, 11.
- 6 Loo, J. H., S. Rosen, and D. E. Bamiou. 2016. 'Auditory Training Effects on the Listening Skills  
7 of Children With Auditory Processing Disorder', *Ear Hear*, 37: 38-47.
- 8 Magnuson, Katherine A, Holly R Sexton, Pamela E Davis-Kean, and Aletha C Huston. 2009.  
9 'Increases in maternal education and young children's language skills', *Merrill-Palmer*  
10 *Quarterly (1982-):* 319-50.
- 11 Moore, D. R., K. Hugdahl, H. J. Stewart, J. Vannest, A. J. Perdew, N. T. Sloat, E. K. Cash, and L.  
12 L. Hunter. 2020. 'Listening Difficulties in Children: Behavior and Brain Activation  
13 Produced by Dichotic Listening of CV Syllables', *Front Psychol*, 11: 675.
- 14 Moore, D. R., S. L. Sieswerda, M. M. Grainger, A. Bowling, N. Smith, A. Perdew, S. Eichert, S.  
15 Alston, L. W. Hilbert, L. Summers, L. Lin, and L. L. Hunter. 2018. 'Referral and  
16 Diagnosis of Developmental Auditory Processing Disorder in a Large, United States  
17 Hospital-Based Audiology Service', *J Am Acad Audiol*, 29: 364-77.
- 18 Parthasarathy, A., K. E. Hancock, K. Bennett, V. DeGruttola, and D. B. Polley. 2020. 'Bottom-up  
19 and top-down neural signatures of disordered multi-talker speech perception in adults  
20 with normal hearing', *Elife*, 9.
- 21 Perrachione, T. K., S. N. Del Tufo, and J. D. Gabrieli. 2011. 'Human voice recognition depends  
22 on language ability', *Science*, 333: 595.
- 23 Petley, L., L. L. Hunter, L. Motlagh Zadeh, H. J. Stewart, N. T. Sloat, A. Perdew, L. Lin, and D.  
24 R. Moore. 2021. 'Listening Difficulties in Children With Normal Audiograms: Relation to  
25 Hearing and Cognition', *Ear Hear*.
- 26 Pienkowski, M. 2017. 'On the Etiology of Listening Difficulties in Noise Despite Clinically  
27 Normal Audiograms', *Ear Hear*, 38: 135-48.
- 28 Quinto, A., S. Abu El Adas, and S. V. Levi. 2020. 'Re-Examining the Effect of Top-Down  
29 Linguistic Information on Speaker-Voice Discrimination', *Cogn Sci*, 44: e12902.
- 30 Rosenberg, Gail Gegg. 2002. "Classroom acoustics and personal FM technology in management  
31 of auditory processing disorder." In *Seminars in hearing*, 309-18. Copyright© 2002 by  
32 Thieme Medical Publishers, Inc., 333 Seventh Avenue, New ....
- 33 Roy, A., L. Hechtman, L. E. Arnold, J. M. Swanson, B. S. G. Molina, M. H. Sibley, A. L.  
34 Howard, and M. T. A. Cooperative Group. 2017. 'Childhood Predictors of Adult  
35 Functional Outcomes in the Multimodal Treatment Study of Attention-  
36 Deficit/Hyperactivity Disorder (MTA)', *J Am Acad Child Adolesc Psychiatry*, 56: 687-95  
37 e7.
- 38 Rutter, Michael, A Bailey, and Catherine Lord. 2003. 'SCQ', *The Social Communication*  
39 *Questionnaire. Torrance, CA: Western Psychological Services.*
- 40 Schafer, Erin C, Jordan Traber, Paige Layden, Aneeqa Amin, Katie Sanders, Danielle Bryant, and  
41 Nicole Baldus. 2014. "Use of wireless technology for children with auditory processing  
42 disorders, attention-deficit hyperactivity disorder, and language disorders." In *Seminars*  
43 *in Hearing*, 193-205. Thieme Medical Publishers.
- 44 Schmucker, C., P. Kapp, E. Motschall, J. Loehler, and J. J. Meerpohl. 2019. 'Prevalence of  
45 hearing loss and use of hearing aids among children and adolescents in Germany: a  
46 systematic review', *BMC public health*, 19: 1277.

- 1 Sharma, M., I. Dhamani, J. Leung, and S. Carlile. 2014. 'Attention, memory, and auditory  
2 processing in 10- to 15-year-old children with listening difficulties', *J Speech Lang Hear*  
3 *Res*, 57: 2308-21.
- 4 Shaywitz, Sally E., Jack M. Fletcher, John M. Holahan, Abigail E. Shneider, Karen E.  
5 Marchione, Karla K. Stuebing, David J. Francis, Kenneth R. Pugh, and Bennett A.  
6 Shaywitz. 1999. 'Persistence of Dyslexia: The Connecticut Longitudinal Study at  
7 Adolescence', *Pediatrics*, 104: 1351-59.
- 8 Sherar, L. B., T. P. Griffin, U. Ekelund, A. R. Cooper, D. W. Esliger, E. M. van Sluijs, L. Bo  
9 Andersen, G. Cardon, R. Davey, K. Froberg, P. C. Hallal, K. F. Janz, K. Kordas, S.  
10 Kriemler, R. R. Pate, J. J. Puder, L. B. Sardinha, A. F. Timperio, and A. S. Page. 2016.  
11 'Association between maternal education and objectively measured physical activity and  
12 sedentary time in adolescents', *J Epidemiol Community Health*, 70: 541-8.
- 13 Skoe, E., J. Krizman, and N. Kraus. 2013. 'The impoverished brain: disparities in maternal  
14 education affect the neural response to sound', *The Journal of neuroscience : the official*  
15 *journal of the Society for Neuroscience*, 33: 17221-31.
- 16 Smoski, W, Michael A Brunt, and J Curtis Tannahill. 1998. 'Children's auditory performance  
17 scale (CHAPS)', *Tampa, FL: Educational Audiology Association*.
- 18 St Clair, M. C., A. Pickles, K. Durkin, and G. Conti-Ramsden. 2011. 'A longitudinal study of  
19 behavioral, emotional and social difficulties in individuals with a history of specific  
20 language impairment (SLI)', *J Commun Disord*, 44: 186-99.
- 21 Taylor, B. K., M. R. Frenzel, J. A. Eastman, A. I. Wiesman, Y. P. Wang, V. D. Calhoun, J. M.  
22 Stephen, and T. W. Wilson. 2020. 'Reliability of the NIH toolbox cognitive battery in  
23 children and adolescents: a 3-year longitudinal examination', *Psychol Med*: 1-10.
- 24 Tomblin, J. B., M. Harrison, S. E. Ambrose, E. A. Walker, J. J. Oleson, and M. P. Moeller. 2015.  
25 'Language Outcomes in Young Children with Mild to Severe Hearing Loss', *Ear Hear*, 36  
26 Suppl 1: 76S-91S.
- 27 Verbeke, Geert. 1997. 'Linear mixed models for longitudinal data.' in, *Linear mixed models in*  
28 *practice* (Springer).
- 29 Weihing, Jeffrey, Gail D Chermak, and Frank E Musiek. 2015. "Auditory training for central  
30 auditory processing disorder." In *Seminars in hearing*, 199-215. Thieme Medical  
31 Publishers.
- 32 Weintraub, S., P. J. Bauer, P. D. Zelazo, K. Wallner-Allen, S. S. Dikmen, R. K. Heaton, D. S.  
33 Tulskey, J. Slotkin, D. L. Blitz, N. E. Carlozzi, R. J. Havlik, J. L. Beaumont, D. Mungas, J.  
34 J. Manly, B. G. Borosh, C. J. Nowinski, and R. C. Gershon. 2013a. 'I. NIH Toolbox  
35 Cognition Battery (CB): introduction and pediatric data', *Monogr Soc Res Child Dev*, 78:  
36 1-15.
- 37 Weintraub, S., S. S. Dikmen, R. K. Heaton, D. S. Tulskey, P. D. Zelazo, P. J. Bauer, N. E.  
38 Carlozzi, J. Slotkin, D. Blitz, K. Wallner-Allen, N. A. Fox, J. L. Beaumont, D. Mungas,  
39 C. J. Nowinski, J. Richler, J. A. Deocampo, J. E. Anderson, J. J. Manly, B. Borosh, R.  
40 Havlik, K. Conway, E. Edwards, L. Freund, J. W. King, C. Moy, E. Witt, and R. C.  
41 Gershon. 2013b. 'Cognition assessment using the NIH Toolbox', *Neurology*, 80: S54-64.
- 42 Whitehouse, A. J. O., K. J. Varcin, S. Pillar, W. Billingham, G. A. Alvares, J. Barbaro, C. A.  
43 Bent, D. Blenkley, M. Boutrus, A. Chee, L. Chetcuti, A. Clark, E. Davidson, S. Dimov, C.  
44 Dissanayake, J. Doyle, M. Grant, C. C. Green, M. Harrap, T. Iacono, L. Matys, M.  
45 Maybery, D. F. Pope, M. Renton, C. Rowbottam, N. Sadka, L. Segal, V. Slonims, J.  
46 Smith, C. Taylor, S. Wakeling, M. W. Wan, J. Wray, M. N. Cooper, J. Green, and K.

1           Hudry. 2021. 'Effect of Preemptive Intervention on Developmental Outcomes Among  
2           Infants Showing Early Signs of Autism: A Randomized Clinical Trial of Outcomes to  
3           Diagnosis', *JAMA Pediatr*, 175: e213298.  
4
